# Supplementary material for: Synthesis, Characterization, and Flocculation Studies of β‐Cyclodextrin‐Based Stimuli‐Responsive Star Copolymer: An Environmental Remediation
Source: PubMed Central journal article supplement (PMC7330502; doi:10.1002/gch2.201900089), 2020-04-01

# Global Challenges

---

Open Access

## Supporting Information

for *Global Challenges*, DOI: 10.1002/gch2.201900089

**Synthesis, Characterization, and Flocculation Studies  
of #-Cyclodextrin-Based Stimuli-Responsive Star Copolymer:  
An Environmental Remediation**

*Kiran, Rambabu Koyilapu, Rudramani Tiwari, Subramanian  
Krishnamoorthi, and Krishna Kumar\**

**Synthesis, characterization and flocculation studies of  $\beta$ -Cyclodextrin based  
stimuli- responsive star copolymer: An Environmental remediation**

Kiran<sup>a</sup>, Rambabu Koyilapu,<sup>c</sup> Rudramani Tiwari,<sup>b</sup> S. Krishnamoorthi<sup>b</sup> and Krishna Kumar<sup>a\*</sup>

<sup>a</sup>*Applied Science Department, Madan Mohan Malaviya University of Technology, Gorakhpur-273010, India*

<sup>b</sup>*Department of Chemistry, Institute of Science, Banaras Hindu University, Varanasi-221005, India*

<sup>c</sup>*School of Chemistry, University of Hyderabad, Gachibowli, Hyderabad-500046, India*

***\*Corresponding author's email id: neerajrab@gmail.com***

---

# GPC DATA

## Supporting Figure (SF)

### SF 1: PNIPAM

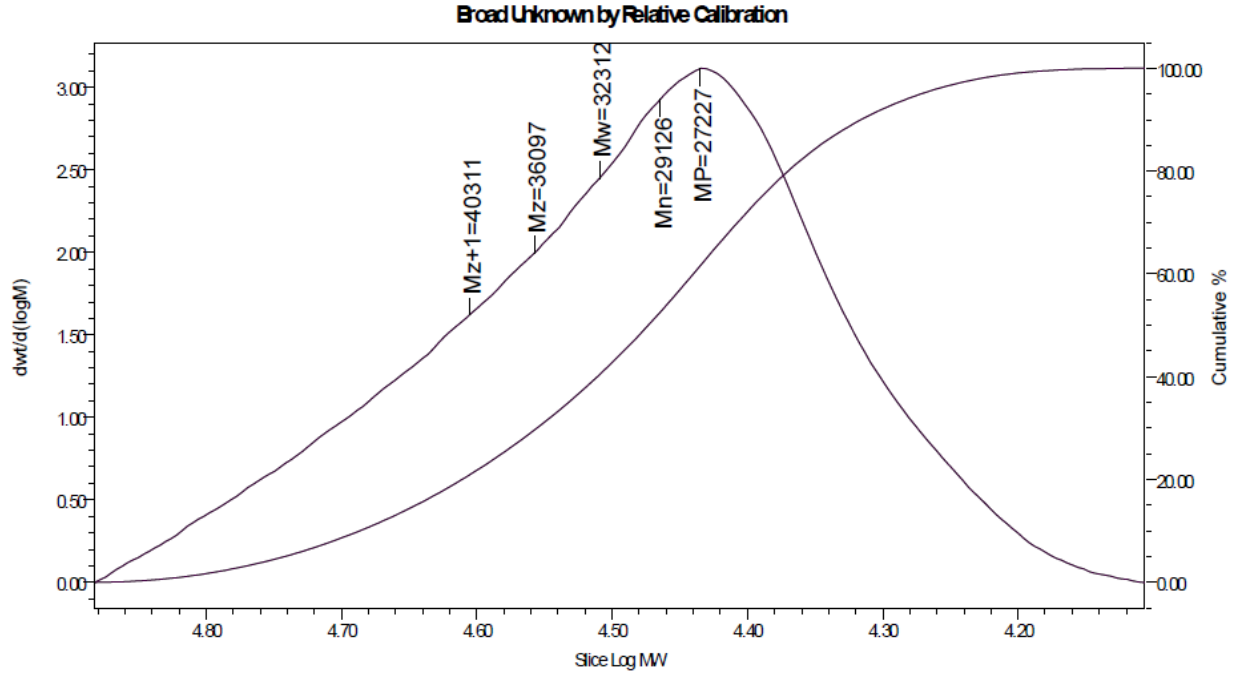

### SF 2: TRP-1

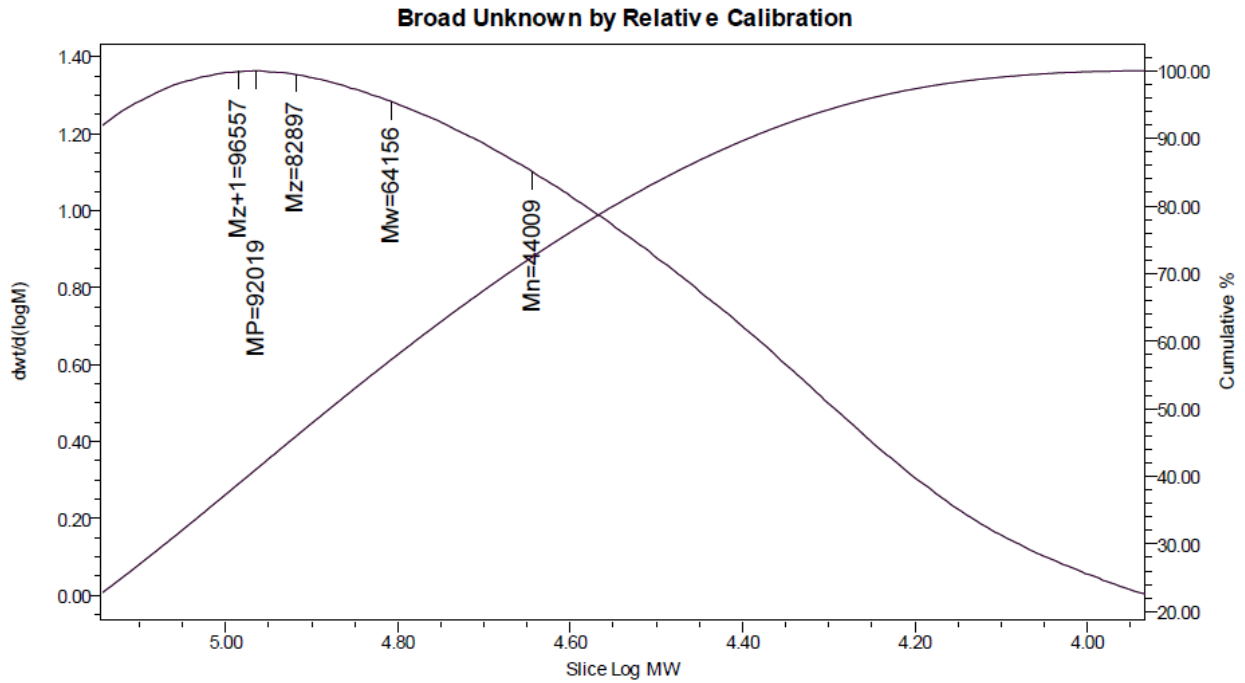

### SF 3: TRP-2

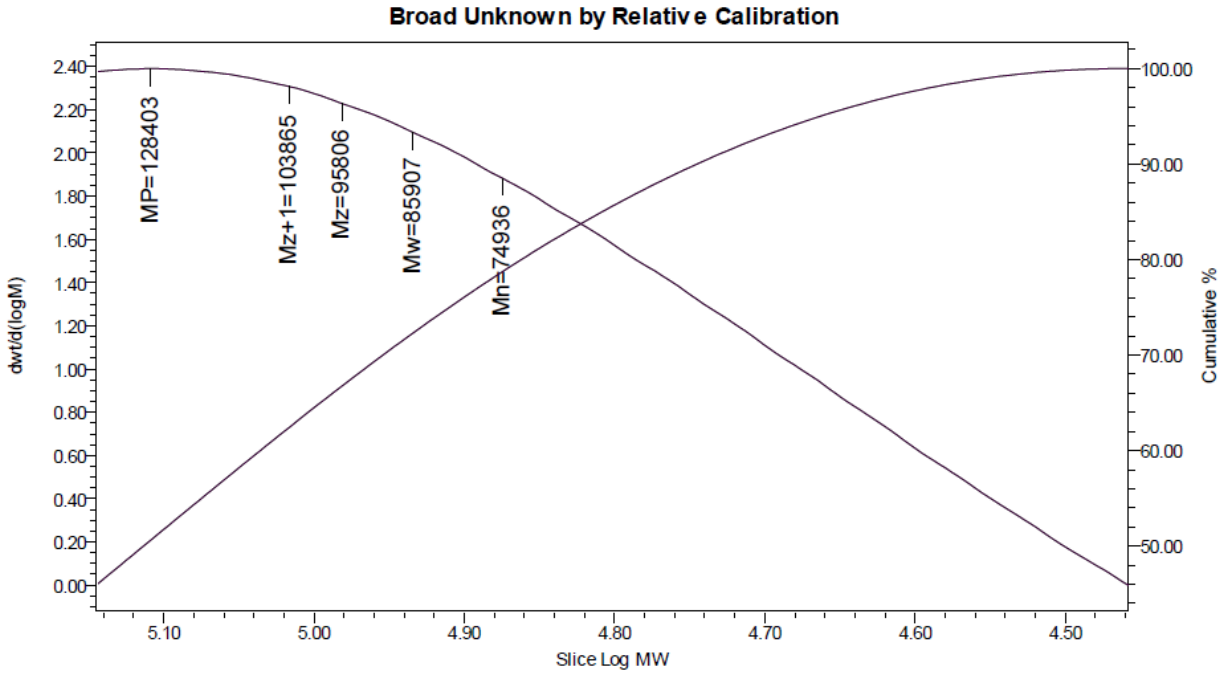

### SF 4: TRP-3

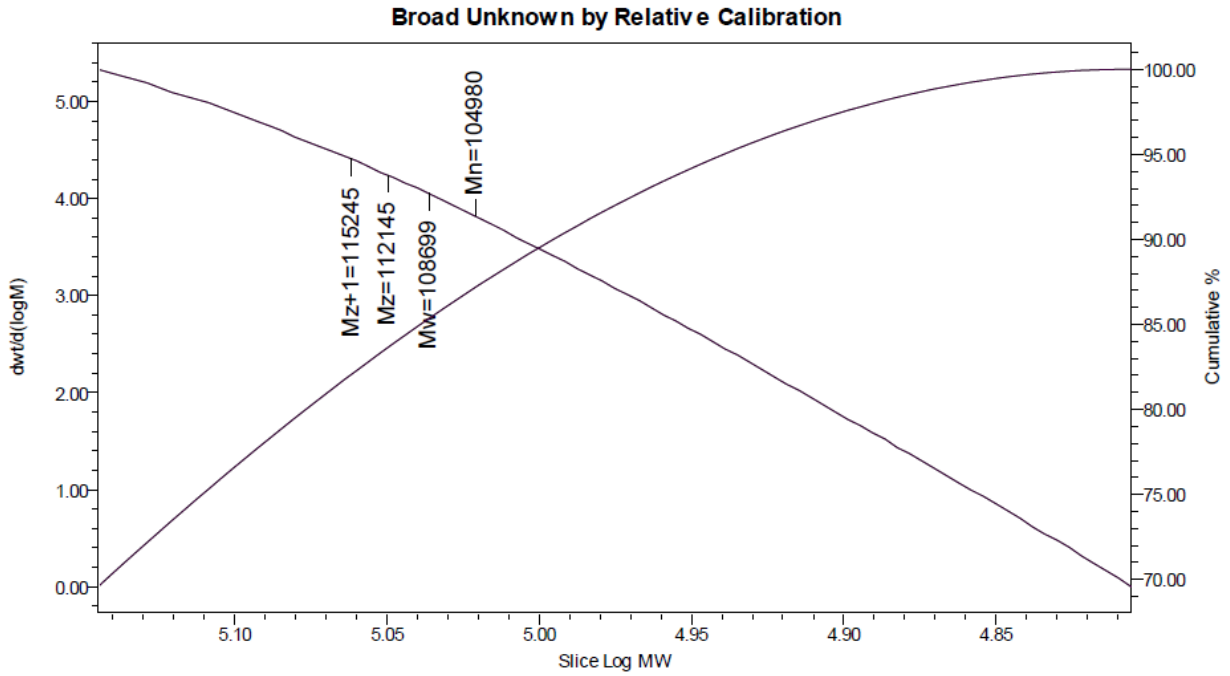

### SF 5: TRP-4

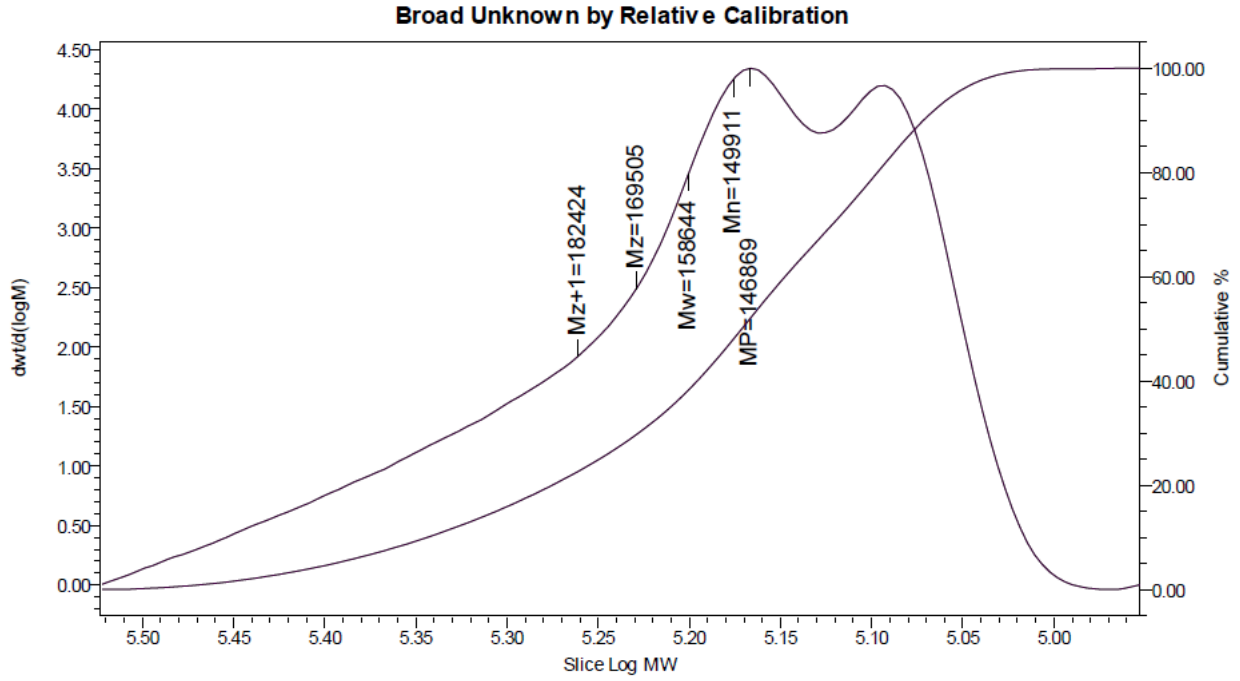

### SF 6: TRP-5

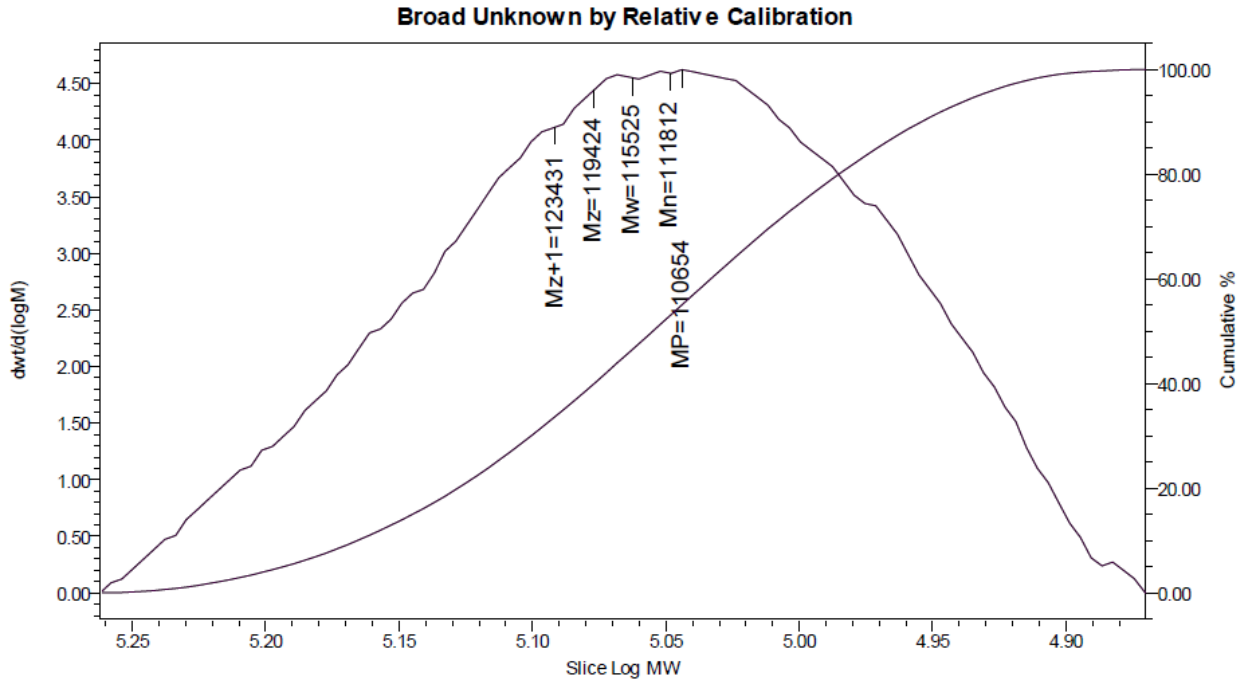

### SF 7: $\beta$ -CD-TRP-1

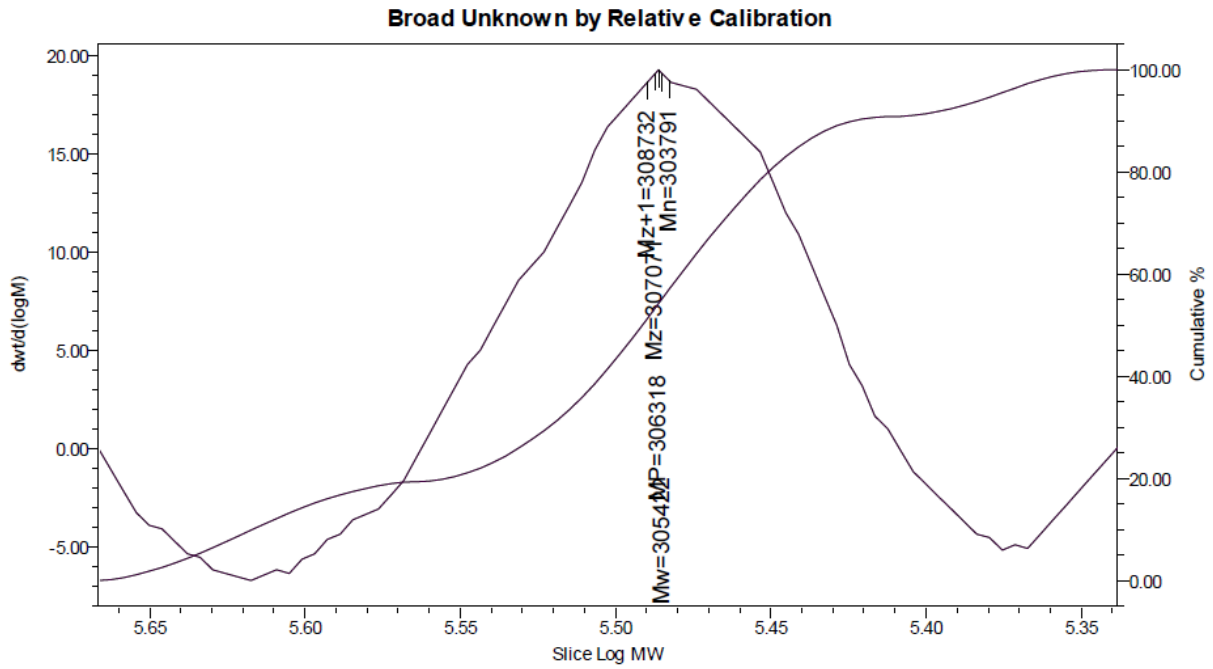

### SF 8: $\beta$ -CD-TRP-2

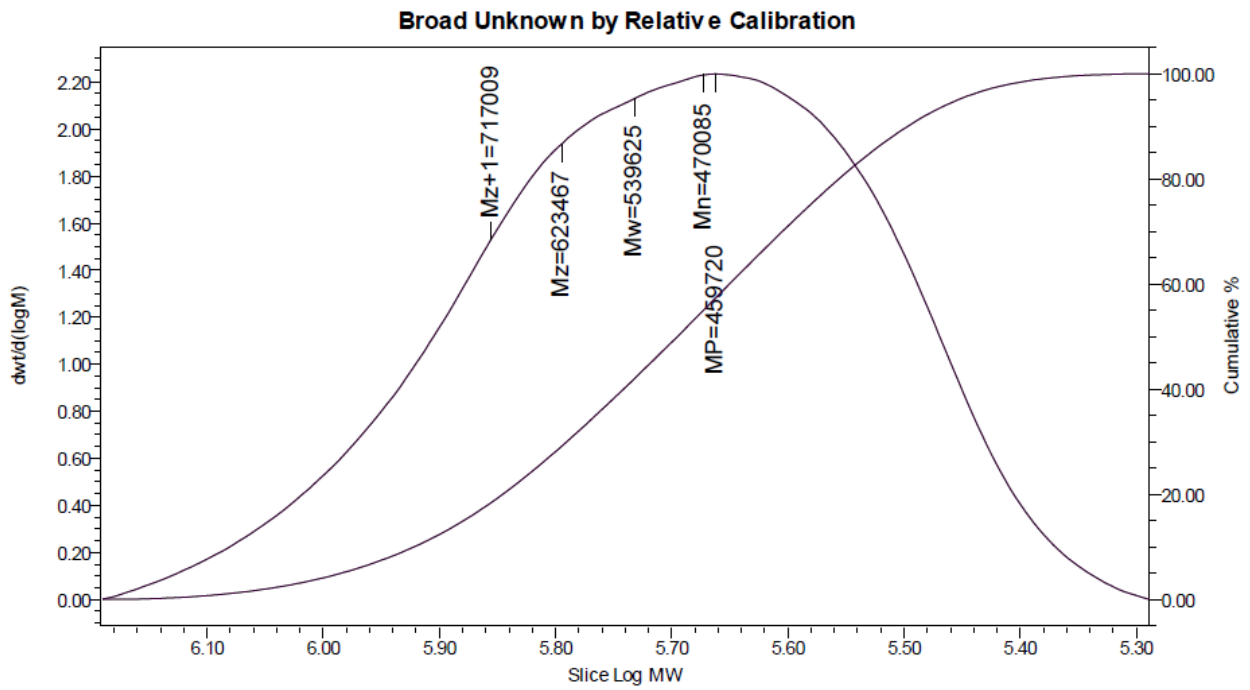

### SF 9: $\beta$ -CD-TRP-3

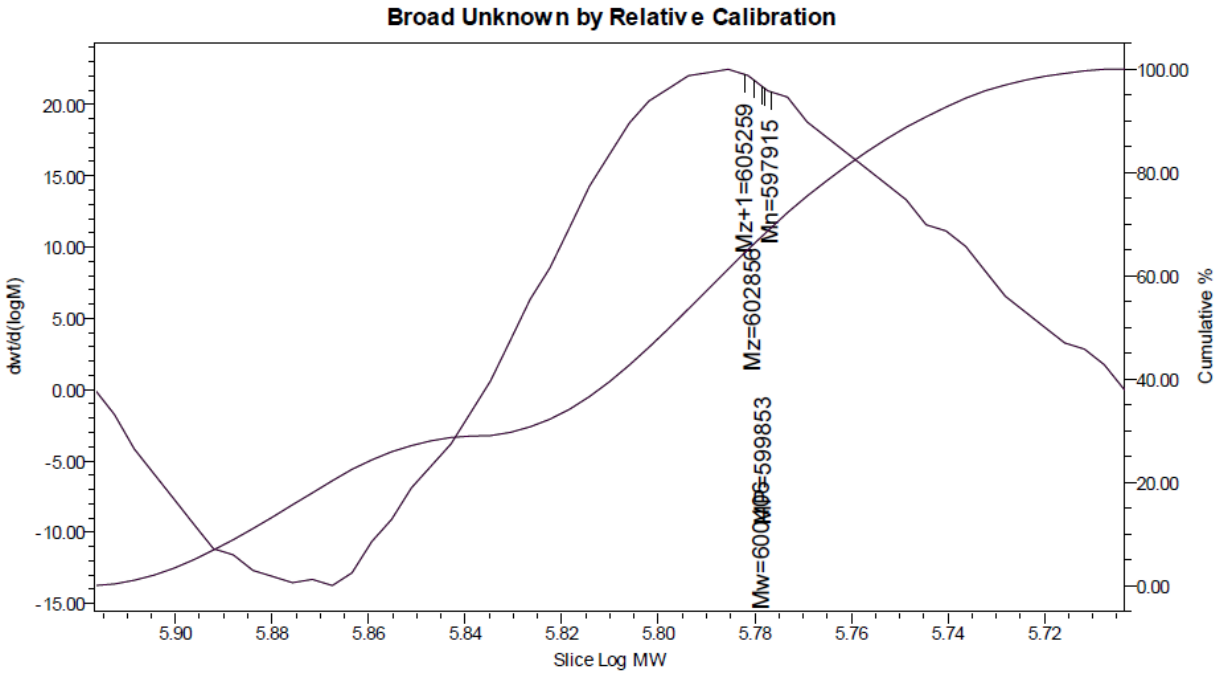

### SF 10: $\beta$ -CD-TRP-4

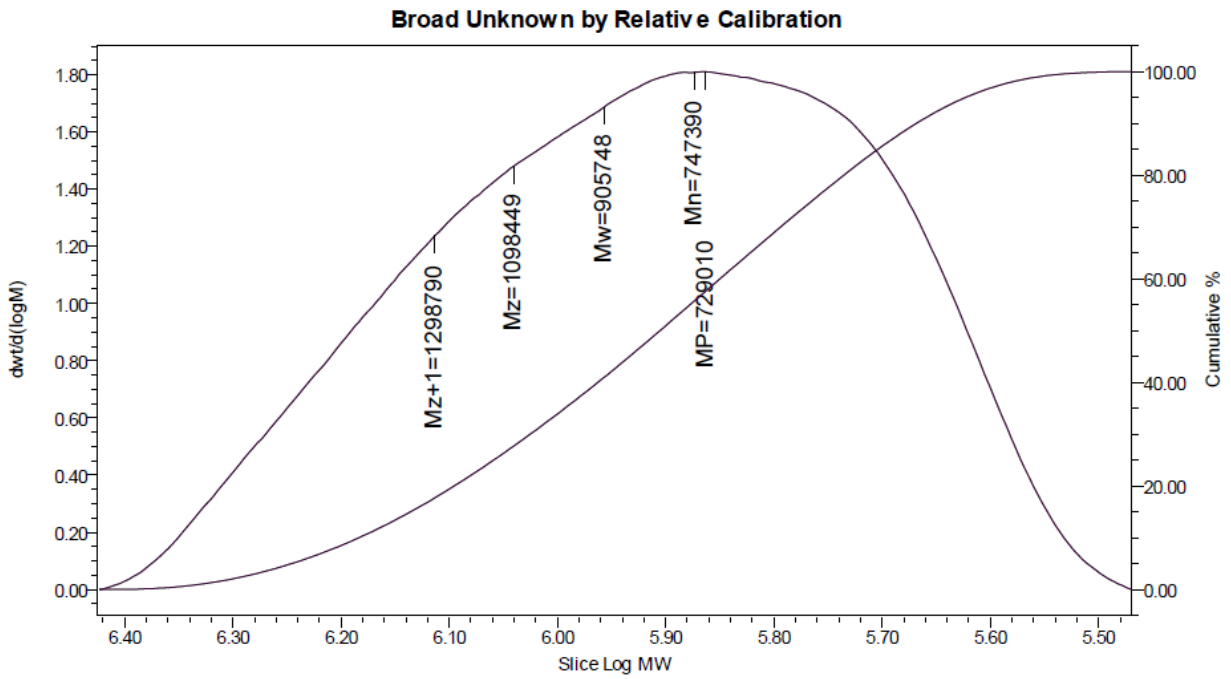

# SF 11: $\beta$ -CD-TRP-5

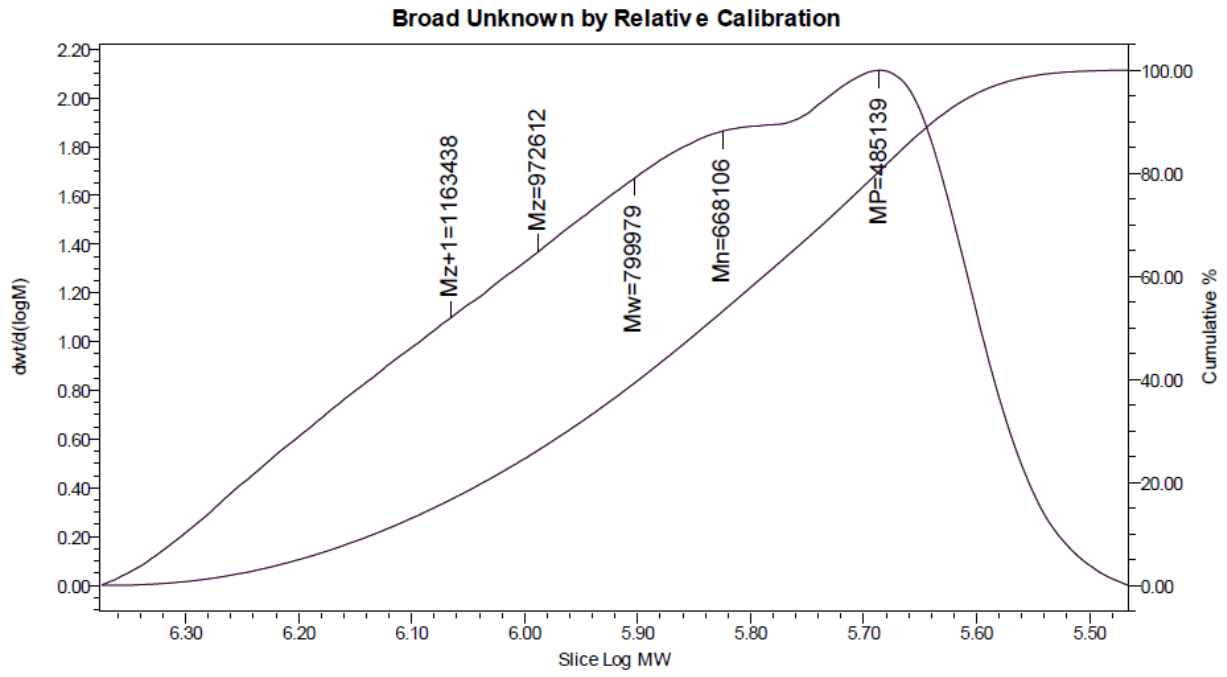

Supplement: GCH2-4-1900089-s001.pdf [file GCH2-4-1900089-s001.pdf]
